# Supplementary material
Source: Springer Nature journal article supplement (https://www.springermedizin.de/resource/supplementary/12889_2011_3376_MOESM4_ESM.pdf/9488900)
Supplement: MOESM4 [file 9488900]

### **Information for reviewers:**

The reviewer has to carefully consider whether the publication fulfills the inclusion criteria stated above or whether the respective publication is rather the means to support translation and implementation of research results published previously in another journal by the author(s). He /She will carefully evaluate the application filled in by the author and his/her arguments and documents for claiming points in each category of the assessment form. In order to receive a societal impact factor, the author has to achieve points in dimension 1 (publication aim) and *additionally* in dimension 2 (specific efforts undertaken) and / or dimension 3 (translation accomplished).
